# Supplementary material for: Conserved Residues Lys64 and Glu78 at the Subunit Surface of Tau Glutathione Transferase in Rice Affect Structure and Enzymatic Properties
Source: MDPI journal article supplement (doi:10.3390/ijms25010398), 2023-12-28
Supplement: s1 [file s1]

**Table S2.** Substrate activities of wild-type OsGSTU17, wild-type TaGSTU4 and its mutant Y93F

| Substrates | Enzymatic activities ( $\mu\text{mol min}^{-1} \text{mg}^{-1}$ ) |                  |                      |
|------------|------------------------------------------------------------------|------------------|----------------------|
|            | OsGSTU17 [21]                                                    | TaGSTU4 [20]     | Y93F of TaGSTU4 [20] |
| NBD-Cl     | $0.203 \pm 0.006$                                                | $0.19 \pm 0.039$ | ND                   |
| CDNB       | $0.113 \pm 0.019$                                                | $1.08 \pm 0.009$ | $0.14 \pm 0.028$     |
| NBC        | $1.153 \pm 0.046$                                                | $0.39 \pm 0.012$ | ND                   |
| Cum-OOH    | $0.013 \pm 0.002$                                                | $0.15 \pm 0.005$ | $0.14 \pm 0.003$     |

Note: The values were shown as means  $\pm$  S.D., calculated from triplicates. ND represents Not Detected. The values of OsGSTU17 were obtained from our previous study [21]. The values of TaGSTU4 were obtained from Wang et al [20].
