# Supplementary material for: Conserved Residues Lys64 and Glu78 at the Subunit Surface of Tau Glutathione Transferase in Rice Affect Structure and Enzymatic Properties
Source: MDPI journal article supplement (doi:10.3390/ijms25010398), 2023-12-28
Supplement: s1 [file s1]

**Table S3.** Primers used for construction of OsGSTU17 mutants

| Mutants | Primer names | Primer sequences (5'-3')                                             |
|---------|--------------|----------------------------------------------------------------------|
| K64A    | K64A-R       | GAC GGT GGA CTC GGC GAG AGG <u>CGC</u> GCC GTC<br>GTG GAC CAG CAC GG |
|         | K64A-F       | CCT CTC GCC GAG TCC ACC GTC                                          |
| E78A    | E78A-R       | GGG GTA GCC GTG CTT CCA GGC <u>CGC</u> GTC GAT<br>GTA CTC GAC GAT GA |
|         | E78A-F       | GCC TGG AAG CAC GGC TAC CCC                                          |
|         | OsGSTU17-Ex1 | TGA <i>ATT</i> CAT GGC AGC AGA CAA GGG AG                            |
|         | OsGSTU17-Ex2 | TAA <i>GCT TTT</i> ACT ACG CCG AGA GGA TCT G                         |

Note: F is short for forward primer; R is short for reverse primer. Mutation sites were underlined. Sites of restriction endonuclease *Eco*R I and *Hind* III were marked with italic.
