# Supplementary material for: Conserved Residues Lys64 and Glu78 at the Subunit Surface of Tau Glutathione Transferase in Rice Affect Structure and Enzymatic Properties
Source: MDPI journal article supplement (doi:10.3390/ijms25010398), 2023-12-28
Supplement: s1 [file s1]

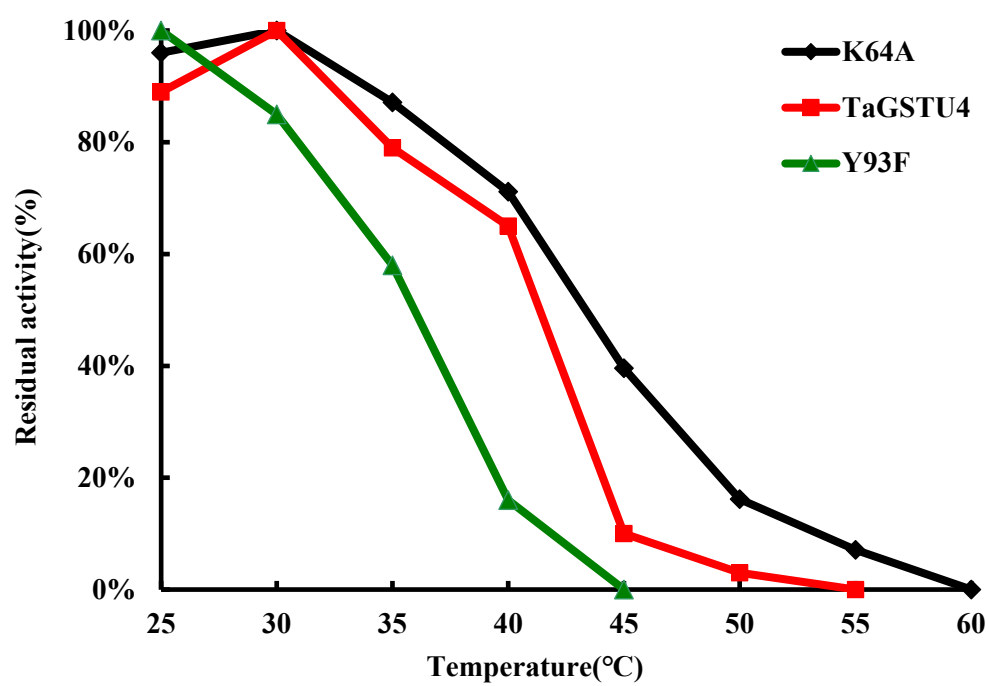

**Figure S1.** Thermodynamic stability of mutant K64A of wild-type OsGSTU17, wild-type TaGSTU4 and its mutant Y93F. The values of TaGSTU4 and its mutant Y93F were obtained from Wang *et al* [20].
