# Supplementary material for: Conserved Residues Lys64 and Glu78 at the Subunit Surface of Tau Glutathione Transferase in Rice Affect Structure and Enzymatic Properties
Source: MDPI journal article supplement (doi:10.3390/ijms25010398), 2023-12-28
Supplement: s1 [file s1]

**Table S1.** Percentage of secondary structures of different types in mutant K64A and E78A and wild type of OsGSTU17

| Protein | Helix | Antiparallel | Parallel | Beta-Turn | Rndm. Coil |
|---------|-------|--------------|----------|-----------|------------|
| WT[28]  | 28.8% | 14.7%        | 9.0%     | 18.1%     | 32.3%      |
| K64A    | 25.6% | 19.3%        | 9.9%     | 18.7%     | 34.9%      |
| E78A    | 23.4% | 22.6%        | 10.5%    | 19.1%     | 36.7%      |

Note: Helix represents  $\alpha$ -helix; Antiparallel represents antiparallel  $\beta$ -sheet; Parallel represents  $\beta$ -sheet; Beta-Turn represents  $\beta$ -turn; Rndm. Coil represents random coil. The values for the wild type were obtained from our previous study [28].
